# Supplementary material for: Emotions in Times of Pandemic Crisis among Italian Children: A Systematic Review
Source: MDPI journal article supplement (doi:10.3390/ijerph20126168), 2023-06-18
Supplement: s1 [file s1]

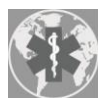

**Table S1.** Quality of appraisal of the included studies assessed with the Newcastle–Ottawa Scale–Cross-sectional studies [36] (n=10).

|                            | Selection Domain          |             |                   | Comparability Domain |                           | Outcome Domain            |                  | Score (0-10)* |
|----------------------------|---------------------------|-------------|-------------------|----------------------|---------------------------|---------------------------|------------------|---------------|
|                            | Sample representativeness | Sample size | Non-response rate | Exposure definition  | Adjustment of the outcome | Assessment of the outcome | Statistical test |               |
| Arace et al. [58]          | 0                         | 1           | 1                 | 1                    | 1                         | 1                         | 1                | 6             |
| Bacaro et al. [59]         | 1                         | 1           | 0                 | 1                    | 1                         | 1                         | 1                | 6             |
| Cellini et al. [60]        | 1                         | 1           | 1                 | 2                    | 1                         | 1                         | 1                | 8             |
| Liang et al. [61]          | 1                         | 1           | 1                 | 2                    | 1                         | 1                         | 1                | 8             |
| Mariani Wigley et al. [63] | 0                         | 1           | 1                 | 2                    | 1                         | 1                         | 1                | 7             |
| Matiz et al. [64]          | 0                         | 1           | 1                 | 2                    | 0                         | 1                         | 1                | 6             |
| Oliva et al.[65]           | 1                         | 1           | 1                 | 2                    | 1                         | 1                         | 1                | 8             |
| Picca et al. [66]          | 1                         | 1           | 1                 | 1                    | 1                         | 1                         | 1                | 7             |
| Scaini et al.[68]          | 1                         | 1           | 1                 | 2                    | 1                         | 1                         | 1                | 8             |
| Scrimin et al.[69]         | 0                         | 1           | 1                 | 2                    | 1                         | 1                         | 1                | 7             |
| Average Domain             |                           | 4.2         |                   |                      | 0.9                       | 2                         |                  | 7.1           |

\* 9–10 =Very Good; 7–8 =Good; 5–6 =Satisfactory; 0– 4 = Unsatisfactory. This scale has been adapted from the Newcastle–Ottawa Quality Assessment Scale for cohort studies and the adapted Newcastle–Ottawa scale created for cross-sectional studies.

**Table S2.** Quality of appraisal of the included studies assessed with the Newcastle–Ottawa Scale–Longitudinal studies [35] (n=3).

|                                     | Selection Domain                     |                                 |                           |                                       | Comparability Domain      | Outcome Domain            |                  |                       | Score (0-9)* |
|-------------------------------------|--------------------------------------|---------------------------------|---------------------------|---------------------------------------|---------------------------|---------------------------|------------------|-----------------------|--------------|
|                                     | Representativeness of exposed cohort | Selection of non-exposed cohort | Ascertainment of exposure | Outcome of interest at start of study | Adjustment of the outcome | Assessment of the outcome | Follow-up length | Adequacy of follow up |              |
| Lionetti et al. <i>Study 1</i> [62] | 1                                    | 0                               | 0                         | 1                                     | 1                         | 0                         | 1                | 1                     | 5            |
| Lionetti et al. <i>Study 2</i> [62] | 1                                    | 0                               | 0                         | 1                                     | 1                         | 0                         | 1                | 1                     | 5            |
| Provenzi et al [67]                 | 1                                    | 0                               | 0                         | 1                                     | 1                         | 0                         | 1                | 1                     | 5            |
| Average Domain                      |                                      | 2                               |                           |                                       | 1                         | 2                         |                  |                       | 5            |

\* 9–10 =Very Good; 7–8 =Good; 5–6 =Satisfactory; 0– 4 = Unsatisfactory. This scale has been adapted from the Newcastle–Ottawa Quality Assessment Scale for cohort studies and the adapted Newcastle–Ottawa scale created for cross-sectional studies.
